# Supplementary material for: Do AML patients with DNMT3A exon 23 mutations benefit from idarubicin as compared to daunorubicin? A single center experience
Source: PubMed Central journal article supplement (PMC3260002; doi:10.18632/oncotarget.347), 2011-11-09
Supplement: oncotarget-02-850-s001.pdf [file oncotarget-02-850-s001.pdf]

**A**  
Figure S1

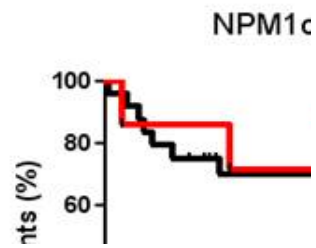

**B**  
Figure S1

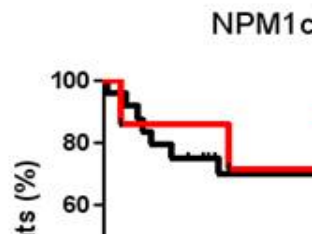

Figure S1: Survival Curves
