# Supplementary material for: Do AML patients with DNMT3A exon 23 mutations benefit from idarubicin as compared to daunorubicin? A single center experience
Source: PubMed Central journal article supplement (PMC3260002; doi:10.18632/oncotarget.347), 2011-11-09
Supplement: oncotarget-02-850-s002.pdf [file oncotarget-02-850-s002.pdf]

**Table S1.** Analysis of covariates associated with the disease free survival. P of the univariate analysis is the p value of the Log rank test. HR is the value of the hazard ratio. 95% CI is the 95% confident interval of the hazard ratio. Data of 130 patients were complete and were included in the Cox proportional-hazards regression.

| DFS                         | Univariate analysis |      |           | Cox regression |      |           |
|-----------------------------|---------------------|------|-----------|----------------|------|-----------|
|                             | p                   | HR   | 95% CI    | p              | HR   | 95% CI    |
| <b>Age &gt; 50y</b>         | 0.86                | 1.04 | 0.66-1.64 | >0.1           |      |           |
| <b>NPM+ FLT3-ITD-</b>       | 0.005               | 0.49 | 0.30-0.81 | 0.001          | 0.36 | 0.34-0.84 |
| <b>normal karyotype</b>     | 0.42                | 0.82 | 0.51-1.33 | >0.1           |      |           |
| <b>allograft</b>            | 0.17                | 0.73 | 0.46-1.15 | 0.006          | 0.53 | 0.19-0.65 |
| <b>IDA treatment</b>        | 0.99                | 1.00 | 0.60-1.67 | >0.1           |      |           |
| <b>WBC count &gt; 30G/L</b> | 0.68                | 1.10 | 0.70-1.75 | >0.1           |      |           |
| <b>DNMT3a mutation</b>      | 0.22                | 0.72 | 0.43-1.22 | >0.1           |      |           |

**Table S2.** Analysis of covariates associated with the overall survival. P of the univariate analysis is the p value of the Log rank test. HR is the value of the hazard ratio. 95% CI is the 95% confident interval of the hazard ratio. Data of 156 patients were complete and were included in the Cox proportional-hazards regression.

| OS                                         | Univariate analysis |      |           | Cox regression |      |           |
|--------------------------------------------|---------------------|------|-----------|----------------|------|-----------|
|                                            | p                   | HR   | 95% CI    | p              | HR   | 95% CI    |
| <b>Age &gt; 50y</b>                        | 0.81                | 1.05 | 0.70-1.59 | >0.1           |      |           |
| <b>NPM+ FLT3-ITD-<br/>normal karyotype</b> | 0.003               | 0.49 | 0.31-0.79 | 0.003          | 0.37 | 0.19-0.71 |
| <b>allograft</b>                           | 0.04                | 0.64 | 0.42-0.98 | 0.049          | 0.61 | 0.37-0.99 |
| <b>IDA treatment</b>                       | 0.46                | 1.19 | 0.75-1.87 | >0.1           |      |           |
| <b>WBC count &gt;<br/>30G/L</b>            | 0.19                | 1.32 | 0.87-1.99 | >0.1           |      |           |
| <b>DNMT3a mutation</b>                     | 0.19                | 0.73 | 0.46-1.17 | >0.1           |      |           |
